# Supplementary material
Source: PubMed Central journal article supplement (PMC6177652)
Supplement: ba021592-suppl1.pdf [file ba021592-suppl1.pdf]

## Supplemental Figures and Methods

### **Inhibition of MEK and ATR is effective in a B-ALL model driven by *Mll-Af4* and activated *Ras***

S. Haihua Chu, Evelyn J Song, Jonathan Chabon, Janna Minehart, Chloe N. Matovina, Jessica L. Woolnough, Elizabeth Frank, Kenneth Ross, Richard P. Koche, Zhaohui Feng, Haiming Xu, Andrei Krivtsov, Andrei Nussenzweig and Scott A. Armstrong

### **Supplemental Figure Legends**

#### **Figure S1. Retroviral transduction of *Mll-Af4* BM with mutant *N-Ras*<sup>G12D</sup> generates aggressive, serially transplantable B-ALL**

A second independent *Mll-Af4* donor (*Mll-Af4-2*) bone marrow was transduced with both retroviruses expressing Cre (Tomato) and mutant *N-Ras*<sup>G12D</sup> (GFP) as previously described. Pre-leukemic cells double positive for cre and *N-Ras*<sup>G12D</sup> were confirmed to be cytokine independent and have the same pro-B immunophenotype described in Figure 1 (B220<sup>+</sup>CD43<sup>+</sup>IgM<sup>-</sup> and Mac1<sup>-</sup>Gr1<sup>-</sup> as well as Cd19<sup>+</sup>Cd24<sup>+</sup>Flt3<sup>+</sup>Cd25<sup>-</sup>IgD<sup>-</sup>).

#### **Figure S2. Immunophenotyping of *Mll-Af4/N-Ras*<sup>G12D</sup> primary and secondary proB-ALLs**

Representative flow cytometry plots of cell surface expression of *Mll-Af4/N-Ras*<sup>G12D</sup> primary and secondary leukemias derived from independent donors (*Mll-Af4-1* and *Mll-Af4-2*). Primary and secondary leukemias were found to express cell surface markers consistent with those in pre-leukemic cultures (Figure 1 and Figure S1) and those found on normal proB cells (B220<sup>+</sup>Cd43<sup>+</sup>Cd19<sup>+</sup>Cd24<sup>+</sup>Flt3<sup>+</sup>cKit<sup>+</sup>IgM<sup>-</sup>IgD<sup>-</sup>Cd25<sup>-</sup>).

**Figure S3. *Mll-Af4/Nras*<sup>G12D</sup> B-ALL gene expression resemble glucocorticoid insensitive human B-ALL gene expression and have low *Hoxa* cluster and *Meis1* expression**

RNA-Sequencing was conducted on primary *Mll-Af4/Nras*<sup>G12D</sup> B-ALLs and compared to wildtype pro-B cells (B220<sup>+</sup>CD43<sup>+</sup>IgM<sup>-</sup>). Ranked lists of differential expression were calculated and GSEA analysis conducted against datasets in MSigDB (A) Significant positive enrichment of gene signatures was observed for a gene signature of persistent B-ALLs that had been treated with glucocorticoids<sup>20</sup> (B) Ct values and of quantitative real-time PCR, of *Hoxa9*, *Hoxa10*, *Hoxa7*, *Meis1* and housekeeping genes *Gapdh* and *Actb* were conducted on independent primary and resultant secondary leukemias (indicated by primary leukemia identifier number followed by a number) using Taqman probes (LifeTechnologies). Ct values for wildtype (WT) pro B cells (B220<sup>+</sup>CD43<sup>+</sup>IgM<sup>-</sup>) were also calculated.

**Figure S4. Prolonged treatment with Trametinib insufficient to prevent leukemic progression.** Mice treated for more than 7 days with either 0.5 mg/kg (A) or 1 mg/kg (B) Trametinib were sacrificed when mice appeared sick and hematopoietic tissues analyzed for leukemic involvement. High levels of GFP<sup>+</sup>Tomato<sup>+</sup> leukemic cells were present in all tissues assessed.

**Figure S5 GSEA of RNA-Sequencing of *Mll-Af4/N-Ras*G12D B-ALL compared to normal pro-B cells**

RNA-Sequencing was conducted on primary *Mll-Af4/Nras*<sup>G12D</sup> B-ALLs and compared to wildtype pro-B cells (B220<sup>+</sup>CD43<sup>+</sup>IgM<sup>-</sup>). Ranked lists of differential expression were calculated and GSEA analysis conducted against MSigDB. Significant negative enrichment of gene signatures for the ATR and G2/M cell cycle checkpoint pathways was observed in primary B-ALLs for (A) Reactome Activation of ATR in Response to Replication Stress, (B) PID ATR Pathway, (C) Whitfield Cell Cycle G2-M, (D) Hallmark G2-M Checkpoint, and (E) Reactome G2-M Checkpoints gene expression signatures.

**Figure S6. Gene expression of ATR pathway members in human patient samples of *MLL-r* B-ALL compared to normal pre-B cells**

Heatmaps and meta-gene expression boxplots for the (A) PID\_ATR pathway or (B) Reactome Activation of ATR in response to Replication Stress gene sets from MSigDB was selected for gene expression analysis. Human *MLL-AF4* infant B-ALL patient Affymetrix Human Genome U133 Plus 2.0 Array data from GEO data sets GSE79450, GSE19475 and GSE77416 were normalized and the relative expression of genes determined. Heatmap includes also expression data from HSCs derived from cord blood (CD34<sup>+</sup>CD38<sup>-</sup>CD19<sup>-</sup>CD33<sup>-</sup>), pre-B (CD34<sup>+</sup>CD19<sup>+</sup>CD33<sup>-</sup>) and myeloid HSPCs (CD34<sup>+</sup>CD33<sup>+</sup>CD19<sup>-</sup>) from GEO data set GSE79450.

**Figure S7. ATR inhibition induces DNA damage in *Mll-r* B-ALL with already elevated basal replicative stress and DNA damage levels and an intact p53 pathway**

(A) Phospho- $\gamma$ H2AX foci detected in *Mll-Af4/N-Ras*<sup>G12D</sup> pre-leukemic cells by immunofluorescence and confocal microscopy. Foci were quantified by Image J analysis. (B) Phospho- $\gamma$ H2AX levels of *Mll-Af9* AMLs and *Mll-Af4* B-ALLs treated for

24 hours with 0, 1, 3  $\mu$ M AZ20. (C) *Mll-Af4/N-Ras*<sup>G12D</sup> pre-leukemic cells were treated with 10 $\mu$ M Nutlin-3 for 24 hours. Cell viability as compared to DMSO controls was measured by DAPI staining by flow cytometry and (D) Fold increase of the percentage of Annexin V<sup>+</sup> cells as a ratio to DMSO controls. Data represented as an average of 4 independent treatment experiments.

**Figure S8. *In vivo* treatment of *Mll-Af4/N-Ras*<sup>G12D</sup> ALL with Trametinib, AZ20 and combination.**

Replicate *in vivo* treatment of B-ALL model as described in Figure 5 with *Mll-Af4/N-Ras*<sup>G12D</sup> leukemia. Survival (A), spleen weights (B), leukemic infiltration (C) and apoptosis (D) measured in hematopoietic tissues as indicated. (\*\*\*)  $p < 0.001$  (\*\*  $p < 0.01$ ) (\*  $p < 0.05$ )

**Figure S9. *In vivo* treatment of *Mll-Af4/N-Ras*<sup>G12D</sup> ALL with Trametinib, AZ20 and combination.**

Replicate *in vivo* treatment of B-ALL model as described in Figure 5 with *Mll-Af4-2/N-Ras*<sup>G12D</sup> leukemia. Leukemic infiltration (A), spleen weight (B) and apoptosis (C) measured in hematopoietic tissues as indicated and similar to those seen in *Mll-Af4/N-Ras*<sup>G12D</sup> leukemia described in Figure 5 and Supplemental Figure 8. (\*\*\*)  $p < 0.001$  (\*\*  $p < 0.01$ ) (\*  $p < 0.05$ )

**Figure S10. Histopathological resolution of leukemic infiltration in BM and spleen of treated mice.** H&E staining of bone marrow from formalin preserved spine sections (A) and spleen (B) from vehicle and combination Trametinib+AZ20 treated mice injected with secondary leukemia cells from Figure 5. Black bar denotes 250  $\mu$ m scale.

**Figure S11. VAF of mutant *RAS* in PDXs harboring *MLL-AF4* translocations after treatment.**

Mutational status of *N/K-RAS* for (A) PDX#83 and (B) PDX #24 treated with vehicle, single agent trametinib or AZ20 or the combination. Frequencies relative to reference sequence and VAF of relevant activating *RAS* mutations plotted at appropriate nucleotide positions plotted. Where there were variants from the reference sequence, plots of all alternate /variant nucleotides at those nucleotide positions and a summary plot of VAFs upon treatment are included with initial PDX sample VAF indicated with dotted blue line.

**Table S1. Genetic characteristics of PDXs harboring *MLL-AF4* translocation and mutant *N-RAS*.** Mutational status of *MLL* and *N-RAS* of patient 042.D1 (#83) and 072.D1 (#24) and PDX samples (042.D1.m88BM and 072.D1.CD3-.m189BM) used in Figure 6.

## **Supplemental Methods**

### **D-J rearrangements**

D-J<sub>H</sub> rearrangements in the IgH locus were detected by a PCR strategy employing two upstream degenerate primers binding 50 of the DFL/DSP element or the DQ52 element, DJHF1 (5'-ACGTCGACTTTTGTSAAGGGATCTACTACTGT-3') and (5'-ACGTCGACGCGGASSACCACAGTGCAACTG-3'). The reverse primer was complementary to a binding site downstream of the JH4 segment (5'-GGGTCTAGACTCTCAGCCGGCTCCCTCAGGG-3')

All three primers were used in a single PCR reaction in a multiplex PCR (94 °C, 1 minute followed by 35 cycles of 94 °C for 60 sec, 60°C for 30 sec, 72 °C for 105 seconds and 72 °C for 10 minutes).

### **Immunofluorescence staining**

Cytospins of 100 000 cells were prepared at 500 rpm for 5 minutes, permeabilized and fixed in 4% paraformaldehyde/PBS at 4°C for 10 minutes. Phospho- $\gamma$ H2AX (Abcam) primary antibody was used at 1:400 and incubated at 4°C overnight. Secondary antibody Anti-rabbit Alexa647 (CST) was applied for 30 minutes at room temperature. DAPI (1  $\mu$ g/ml) was applied for 5 minutes at room temperature, and the samples were covered with Prolong Gold Antifade Reagent (ThermoFisher). Slides were analyzed by confocal microscopy (Leica TCS SP5) (Leica) and foci were quantified using Image J software (NIH).

### **VAF determination of PDX samples**

Genomic DNA was isolated from hCD45 enriched bone marrow from PDX mice treated with vehicle, single agent trametinib or AZ20 or combination and PCR-amplified for a 236-246bp amplicon which was submitted for next generation sequencing. >50,000 reads of 150bp paired-end reads were obtained on an Illumina MiSeq platform and aligned to hg19 for allele frequency detection. Primers for amplification were as follows:

*NRASG12* Fwd: 5'-TAGATGTGGCTCGCCAATTA-3', *NRASG12* Rev: 5'-

TGGGTAAAGATGATCCGACA-3', *KRASG12* Fwd 5'-

GGTGGAGTATTTGATAGTGTATTAACC-3', *KRASG12* Rev: 5'-

AGAATGGTCCTGCACCAGTAA-3'

*NRASQ61* Fwd: 5'-CACCCCCAGGATTCTTACAG-3', *NRASQ61* Rev:5'-

CCTCATTTCCTCCATAAAGATTCAGA-3'

### **RNA-sequencing and human gene expression analysis**

For RNA-sequencing, reads were quality and adapter trimmed using 'trim\_galore' before aligning to mouse assembly mm9 with STAR v2.4 and assessed using the Picard tool (<http://broadinstitute.github.io/picard/>). Read count tables were created using HTSeq v0.6.1. Normalization and expression dynamics were evaluated with DESeq2 using the default parameters.

fRMA normalization uses pre-computed estimates of probe specific effects and variances to permit samples to be processed in batches<sup>18</sup>. The probe set with maximum variance was used with genes with multiple probe sets. Heat maps were produced with the

bioconductor package pheatmap in R using row scaling of log2 data. Meta-genes for the box plots were found by taking the mean of the log2 expression for all genes in the signature for each sample. The probe set with maximum variance was used with genes with multiple probe sets. Heat maps were produced with the bioconductor package pheatmap in R using row scaling of log2 data. Meta-genes for the box plots were found by taking the mean of the log2 expression for all genes in the signature for each sample.

## **Histology**

Tissues were fixed in 4% paraformaldehyde for 24 hours and then put into graded alcohol from 75% to 100% to dehydrate. After transparent in xylene, the tissues were embedded in paraffin. 4  $\mu$ m section were sliced from the paraffin blocks and then kept in 65°C oven for two hours. The slides were de-paraffinized in xylene and rehydrated in graded alcohol from 100% to 75%.

De-paraffinized sections were stained in hematoxylin solution (Servicebio, G1005-1) for 5 minutes. After washed in water, the slides were differentiated in 1% acid alcohol for 30 seconds and then stained in 0.2% ammonium hydroxide for several seconds. After washed in water, the slides were dehydrated through 85% alcohol and 95% alcohol respectively and then stained in Eosin Y solution (Servicebio, G1005-2) for 3 minutes. After dehydration in three absolute alcohol solutions and transparent in xylene, the slides were covered with a neutral resin mounting medium.

Whole tissues on slides were scanned by the digital slides scanner (3D Histech, MIDI) and then viewed with Caseviewer (3D Histech).



## **Statistical analysis**

p values for standard comparisons of two groups were calculated using unpaired, two-tailed, Student's t-test. For multivariate analysis, 1-way ANOVA analyses were conducted to determine significance. p values for survival studies were calculated using log-rank (Mantel-Cox) test. For all p values, (\*)  $p < 0.05$ ; (\*\*)  $P < 0.01$ , (\*\*\*)  $p < 0.001$ .

***Mil-Af4-2/Nras<sup>G12D</sup>* pre-leukemic cells:**

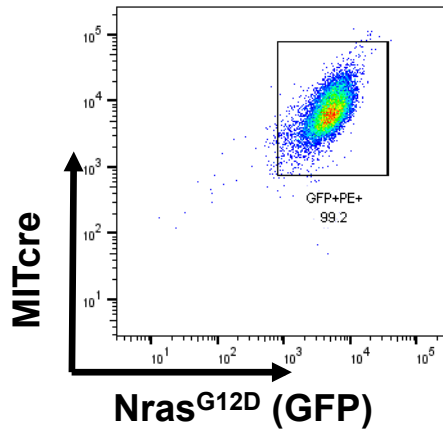

**Gating on GFP<sup>+</sup>MITcre<sup>+</sup> cells:**

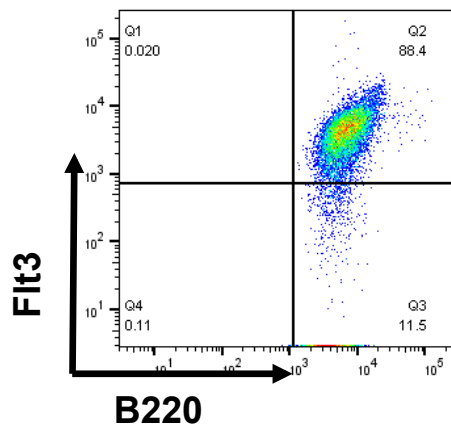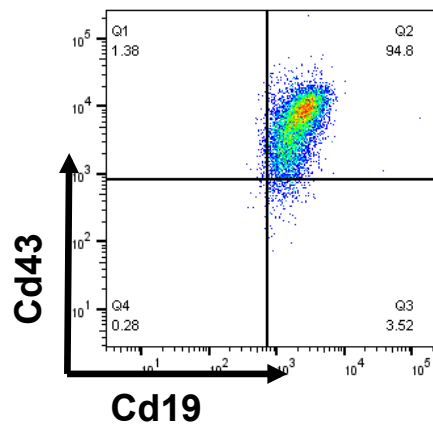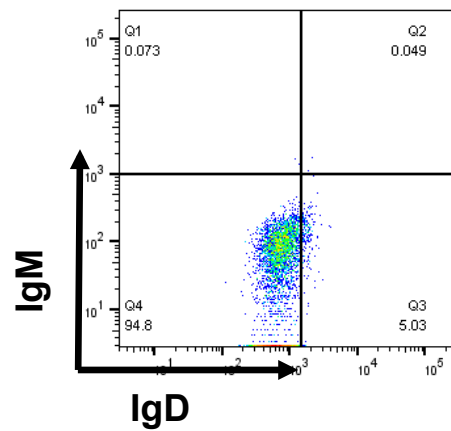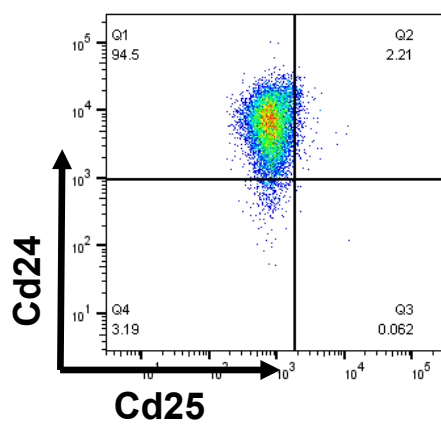

Figure S1

Gating on leukemic cells (GFP<sup>+</sup>MITcre<sup>+</sup>):

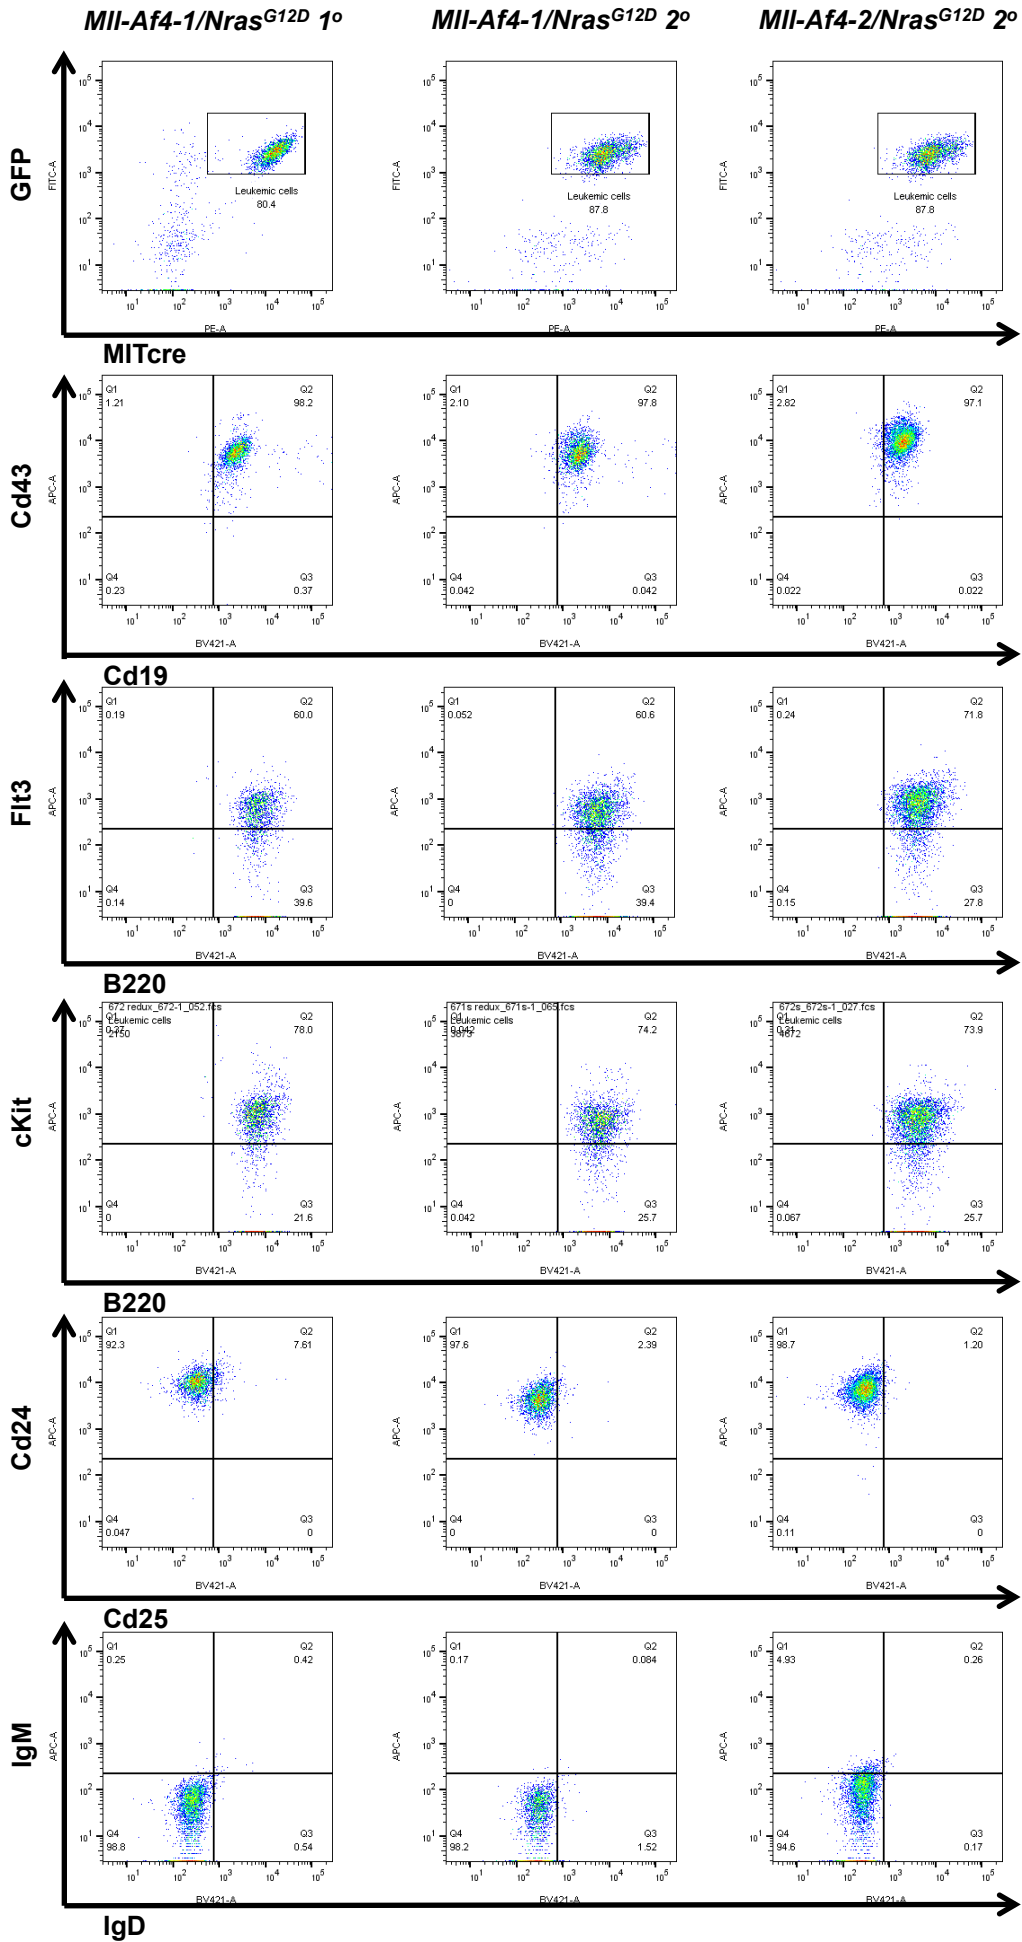

Figure S2

**A**

RHEIN\_ALL\_GLUCOCORTICOID\_THERAPY\_UP

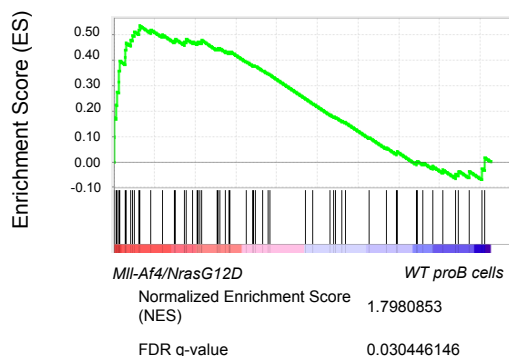

**B**

|                                        | HoxA9        | stdev        | HoxA10        | stdev        | Meis1        | stdev        | Actb         | Stdev        |              |              |
|----------------------------------------|--------------|--------------|---------------|--------------|--------------|--------------|--------------|--------------|--------------|--------------|
| <b>Primary Mll-Af4/Nras leukemia</b>   |              |              |               |              |              |              |              |              |              |              |
| 72                                     | 32.539       | 0.222        | 34.637        | 0.346        | 28.492       | 0.238        | 21.162       | 0.045        |              |              |
| 672                                    | 31.669       | 0.011        | 35.059        | 0.820        | 32.631       | 0.175        | 18.676       | 0.218        |              |              |
| 668                                    | 32.980       | 0.152        | Undetermined  | N/A          | 34.053       | 0.212        | 20.682       | 0.170        |              |              |
| N1                                     | 33.428       | 1.752        | 34.819        | 0.856        | 32.948       | 0.660        | 21.038       | 0.101        |              |              |
| 671                                    | 30.719       | 0.191        | 34.031        | 2.277        | 31.858       | 0.769        | 18.841       | 0.341        |              |              |
| <b>Secondary Mll-Af4/Nras leukemia</b> |              |              |               |              |              |              |              |              |              |              |
| 672-1                                  | 32.534       | 0.008        | Undetermined  | N/A          | 32.446       | 0.285        | 17.231       | 0.081        |              |              |
| 668-1                                  | 33.064       | 0.069        | 37.090        | N/A          | 35.677       | 0.209        | 20.401       | 0.436        |              |              |
| 672-2                                  | 31.143       | 0.839        | 34.437        | 0.354        | 31.727       | 0.233        | 17.451       | 0.103        |              |              |
| 668-2                                  | 32.836       | 0.001        | 35.882        | 0.129        | 35.217       | 0.422        | 19.913       | 0.261        |              |              |
| 672-3                                  | 32.427       | 0.470        | 34.758        | N/A          | 31.510       | 0.231        | 16.726       | 0.066        |              |              |
| 668-3                                  | 32.929       | 0.895        | 36.001        | N/A          | 34.135       | 0.359        | 19.981       | 0.052        |              |              |
| 668-4                                  | 33.103       | 0.001        | 33.502        | 0.056        | 34.764       | 0.291        | 19.530       | 0.421        |              |              |
| N1-1                                   | 32.939       | 0.473        | 34.669        | N/A          | 33.572       | 0.074        | 19.736       | 0.287        |              |              |
| 668-5                                  | 32.674       | 0.057        | Undetermined  | N/A          | 35.178       | 0.096        | 19.710       | 0.226        |              |              |
| N1-2                                   | 35.248       | 0.180        | Undetermined  | N/A          | 36.120       | 0.620        | 21.736       | 0.463        |              |              |
| N1-3                                   | 33.386       | 0.276        | 34.775        | N/A          | 34.505       | 0.290        | 18.813       | 0.112        |              |              |
| 671-1                                  | 33.144       | 0.190        | Undetermined  | N/A          | 33.734       | 0.243        | 18.062       | 0.141        |              |              |
| N1-4                                   | 31.571       | 0.155        | 34.867        | 0.813        | 35.282       | 0.282        | 19.561       | 0.241        |              |              |
| 671-2                                  | 33.200       | 0.286        | 34.486        | N/A          | 34.083       | 0.068        | 18.449       | 0.274        |              |              |
| 671-3                                  | 34.545       | 1.066        | 35.225        | 0.742        | 36.269       | 0.105        | 19.061       | 0.170        |              |              |
| 671-4                                  | 34.670       | 0.363        | 35.769        | N/A          | 36.147       | 1.190        | 20.833       | 0.114        |              |              |
| <b>WT proB cells</b>                   | 31.409       | 0.155        | 37.790        | 0.380        | 33.022       | 0.033        | 19.409       | 0.006        |              |              |
|                                        |              |              |               |              |              |              |              |              |              |              |
|                                        | <b>HoxA9</b> | <b>stdev</b> | <b>HoxA10</b> | <b>stdev</b> | <b>HoxA7</b> | <b>stdev</b> | <b>Meis1</b> | <b>stdev</b> | <b>Gapdh</b> | <b>stdev</b> |
| <b>WT proB cells</b>                   | 32.999       | 0.053        | 35.640        | 0.086        | 33.015       | 0.038        | 32.465       | 0.117        | 20.962       | 0.037        |
| J601 primary                           | 32.515       | 0.276        | 31.127        | 0.295        | 34.713       | 0.154        | 31.666       | 0.148        | 21.316       | 0.109        |
| J602 primary                           | 32.716       | 0.014        | 32.102        | 0.239        | 35.746       | 0.144        | 30.882       | 0.129        | 21.118       | 0.052        |
| J603 primary                           | 31.520       | 0.237        | 31.635        | 0.141        | 34.327       | 0.114        | 30.139       | 0.085        | 21.597       | 0.133        |

Figure S3

**A**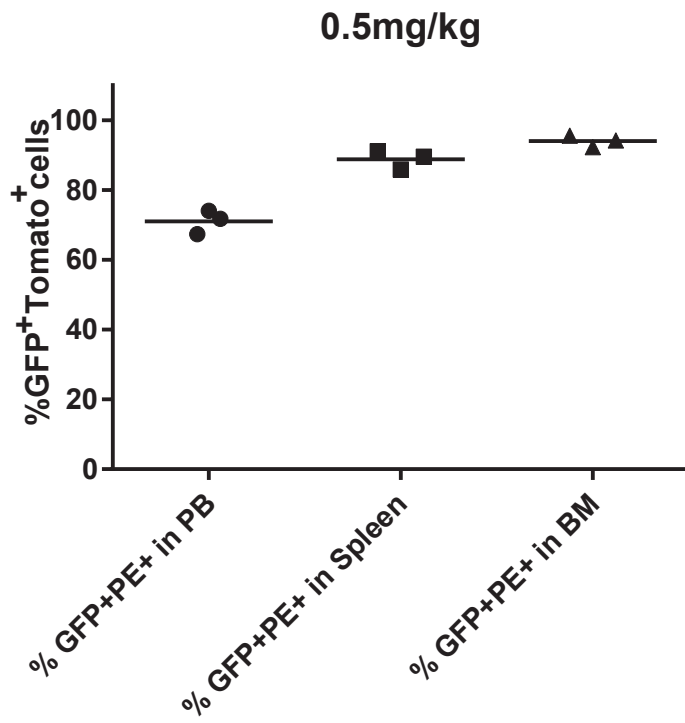**B**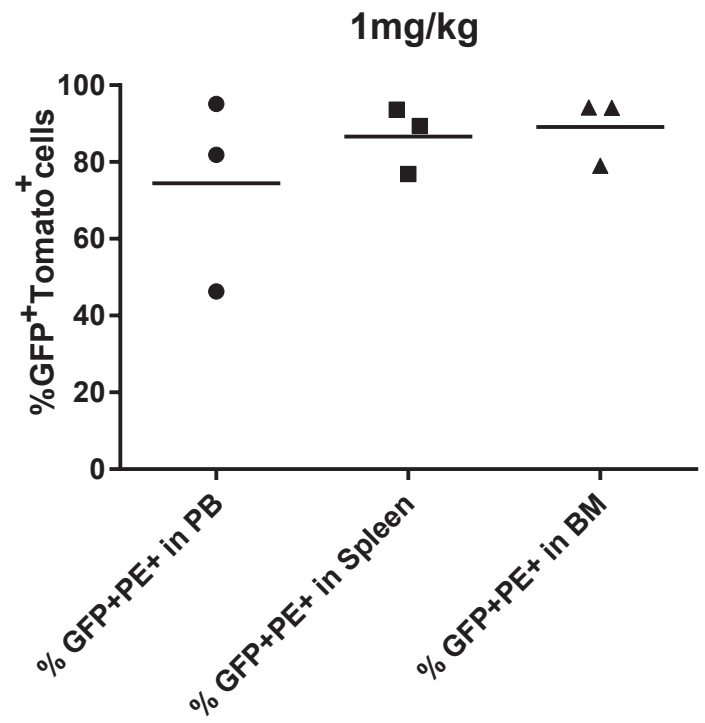

Figure S4

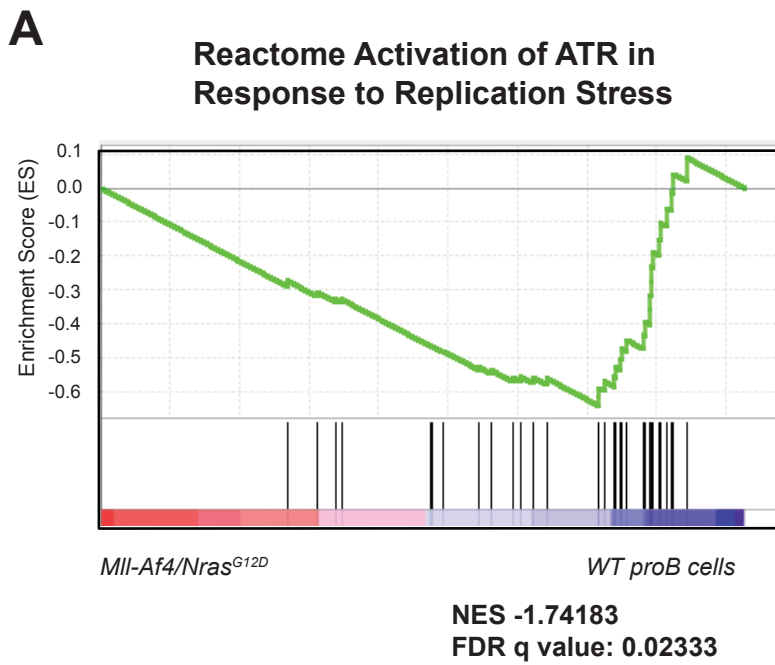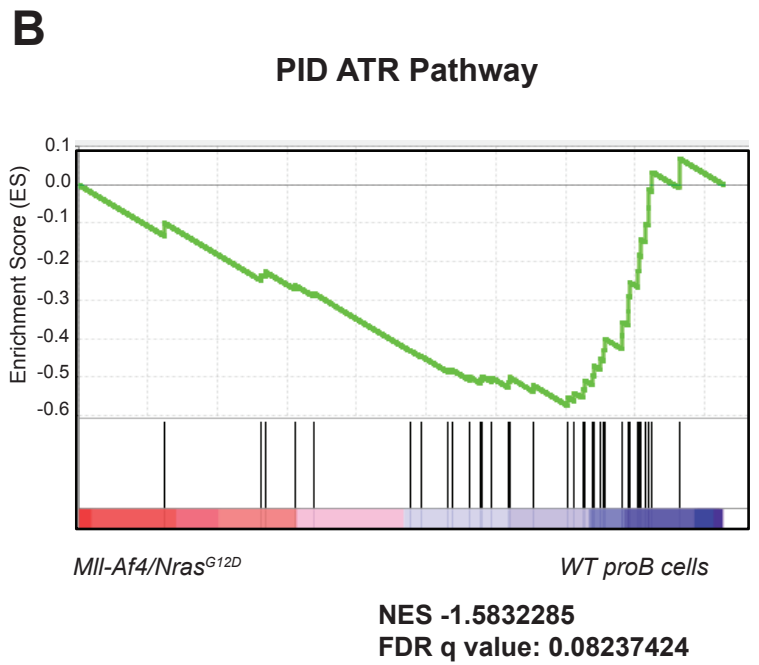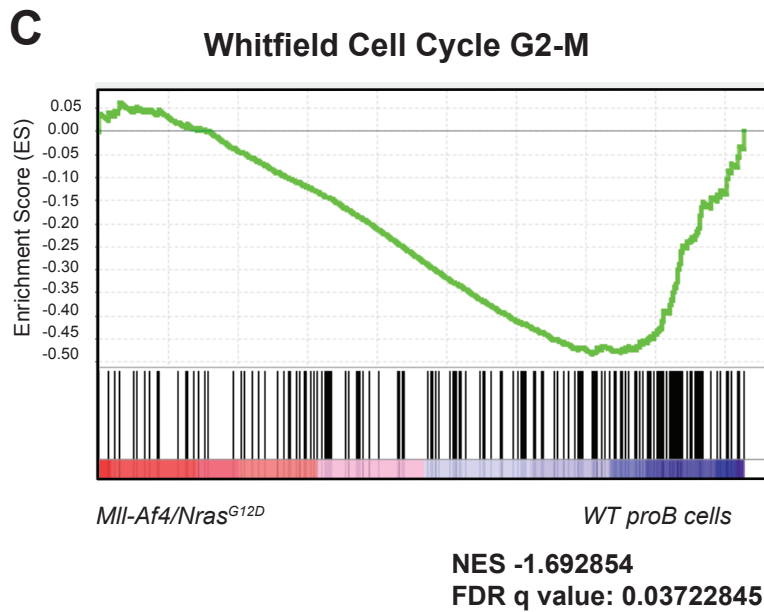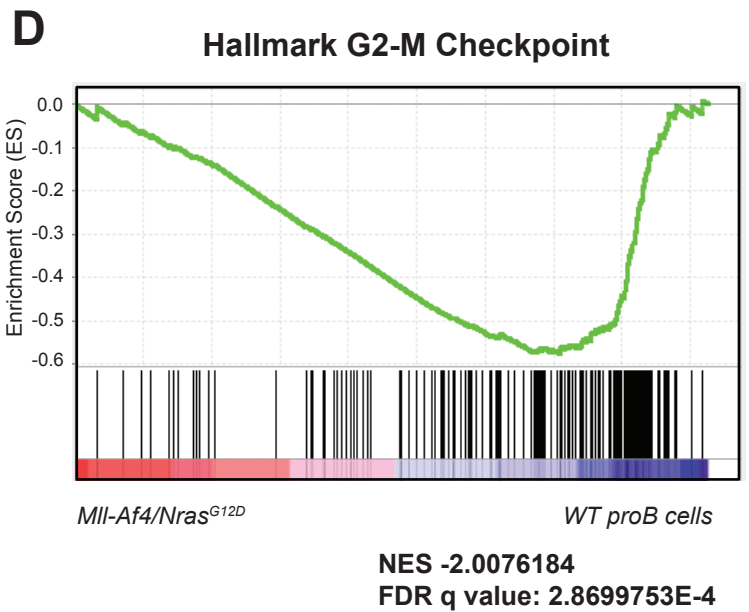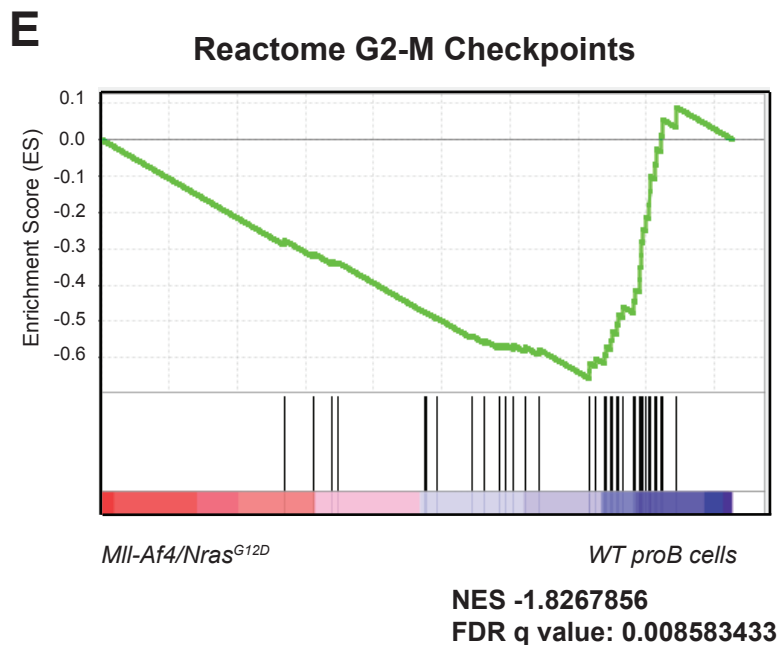

Figure S5

A

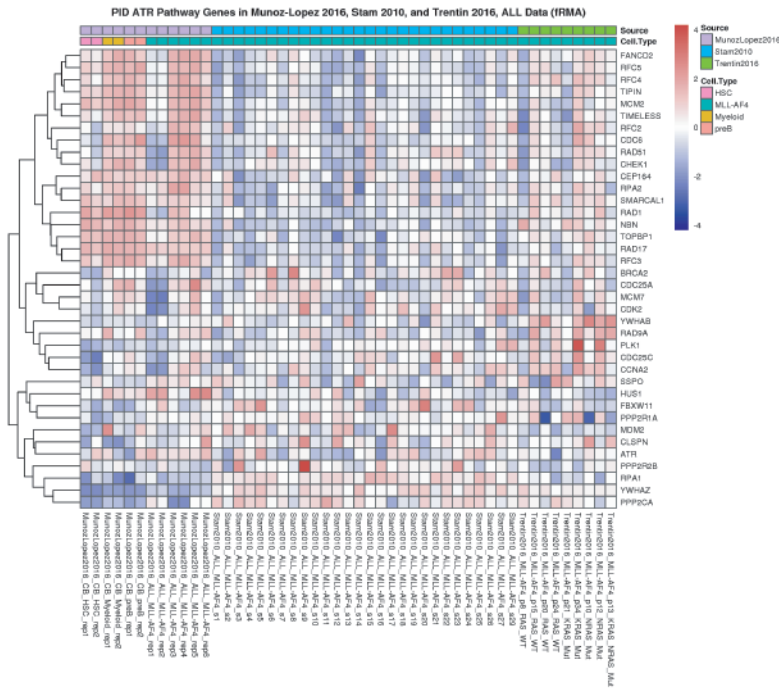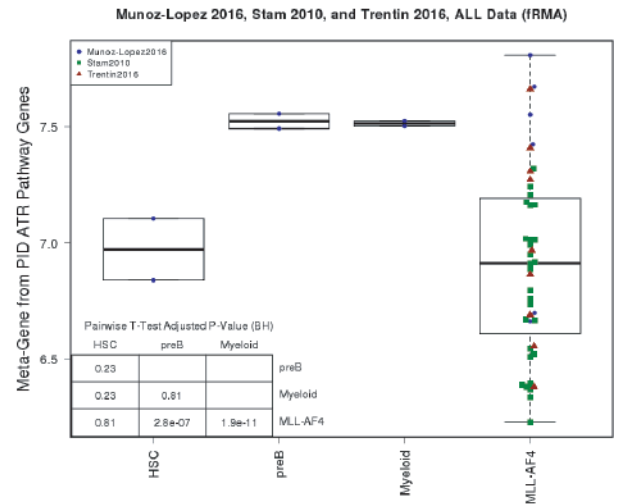

B

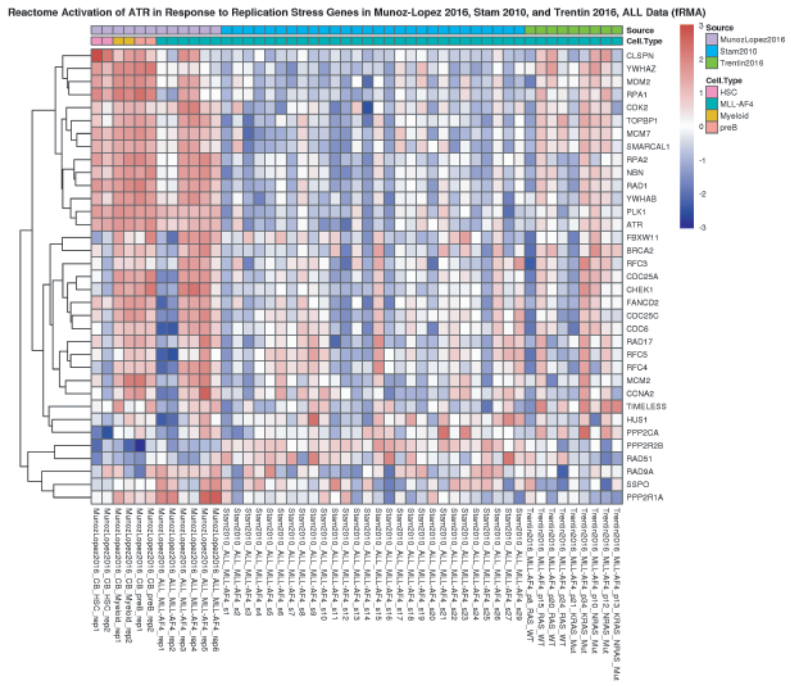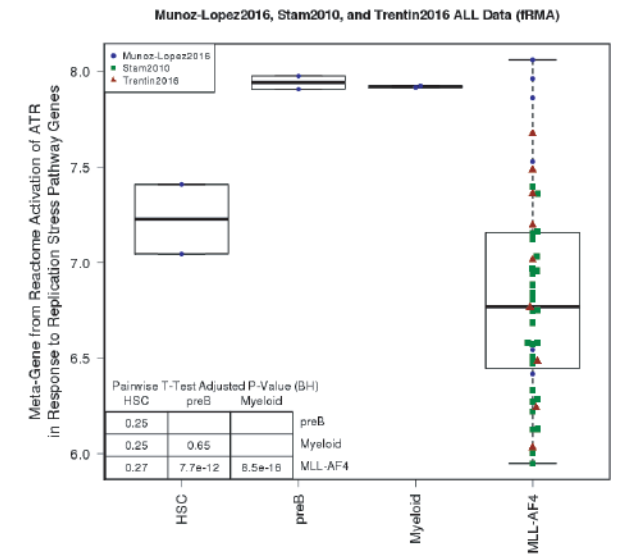

Figure S6

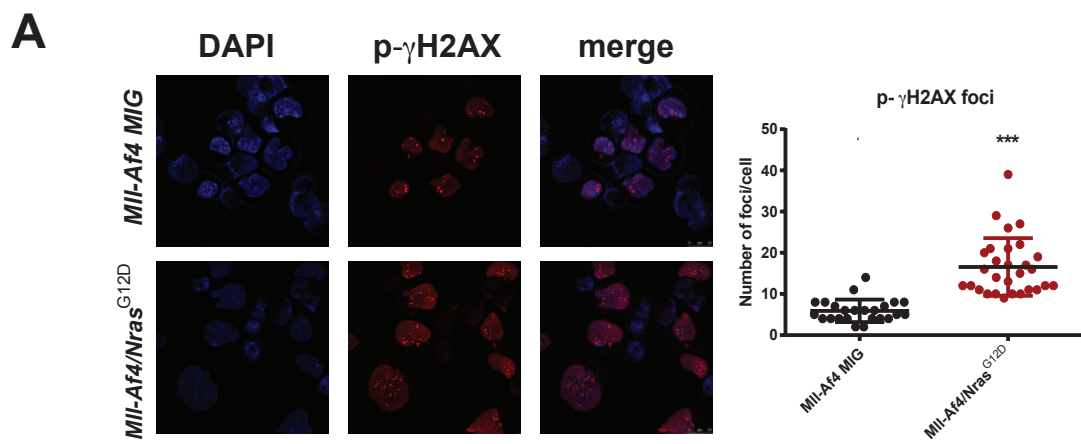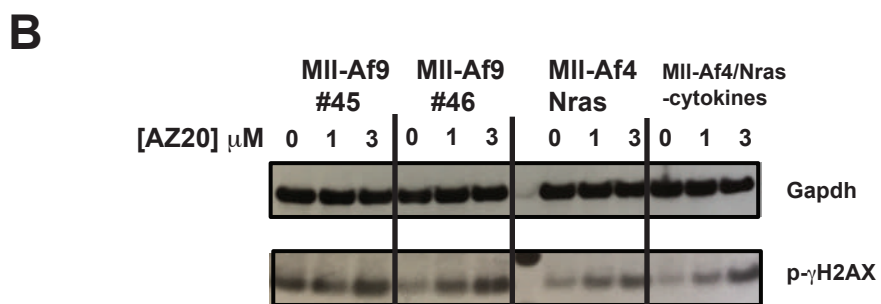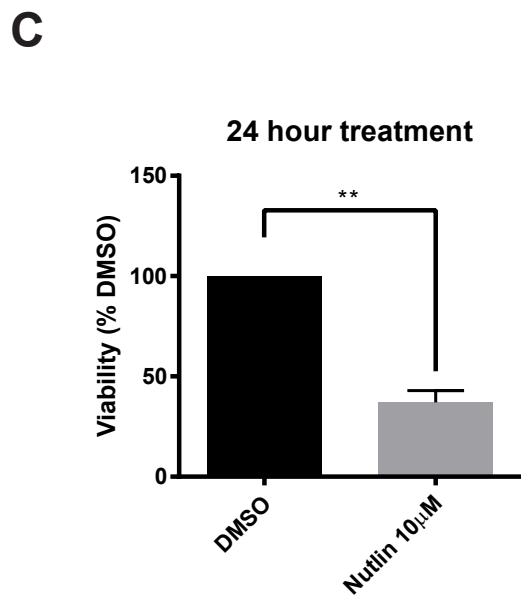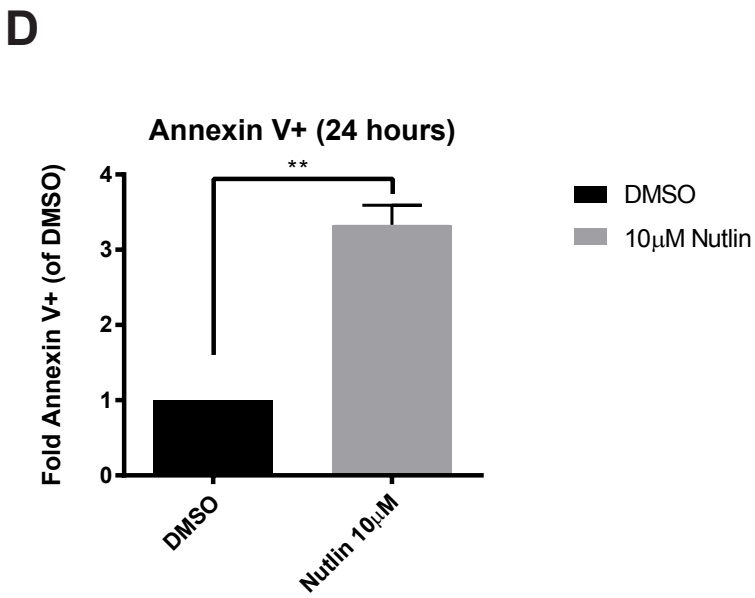

Figure S7



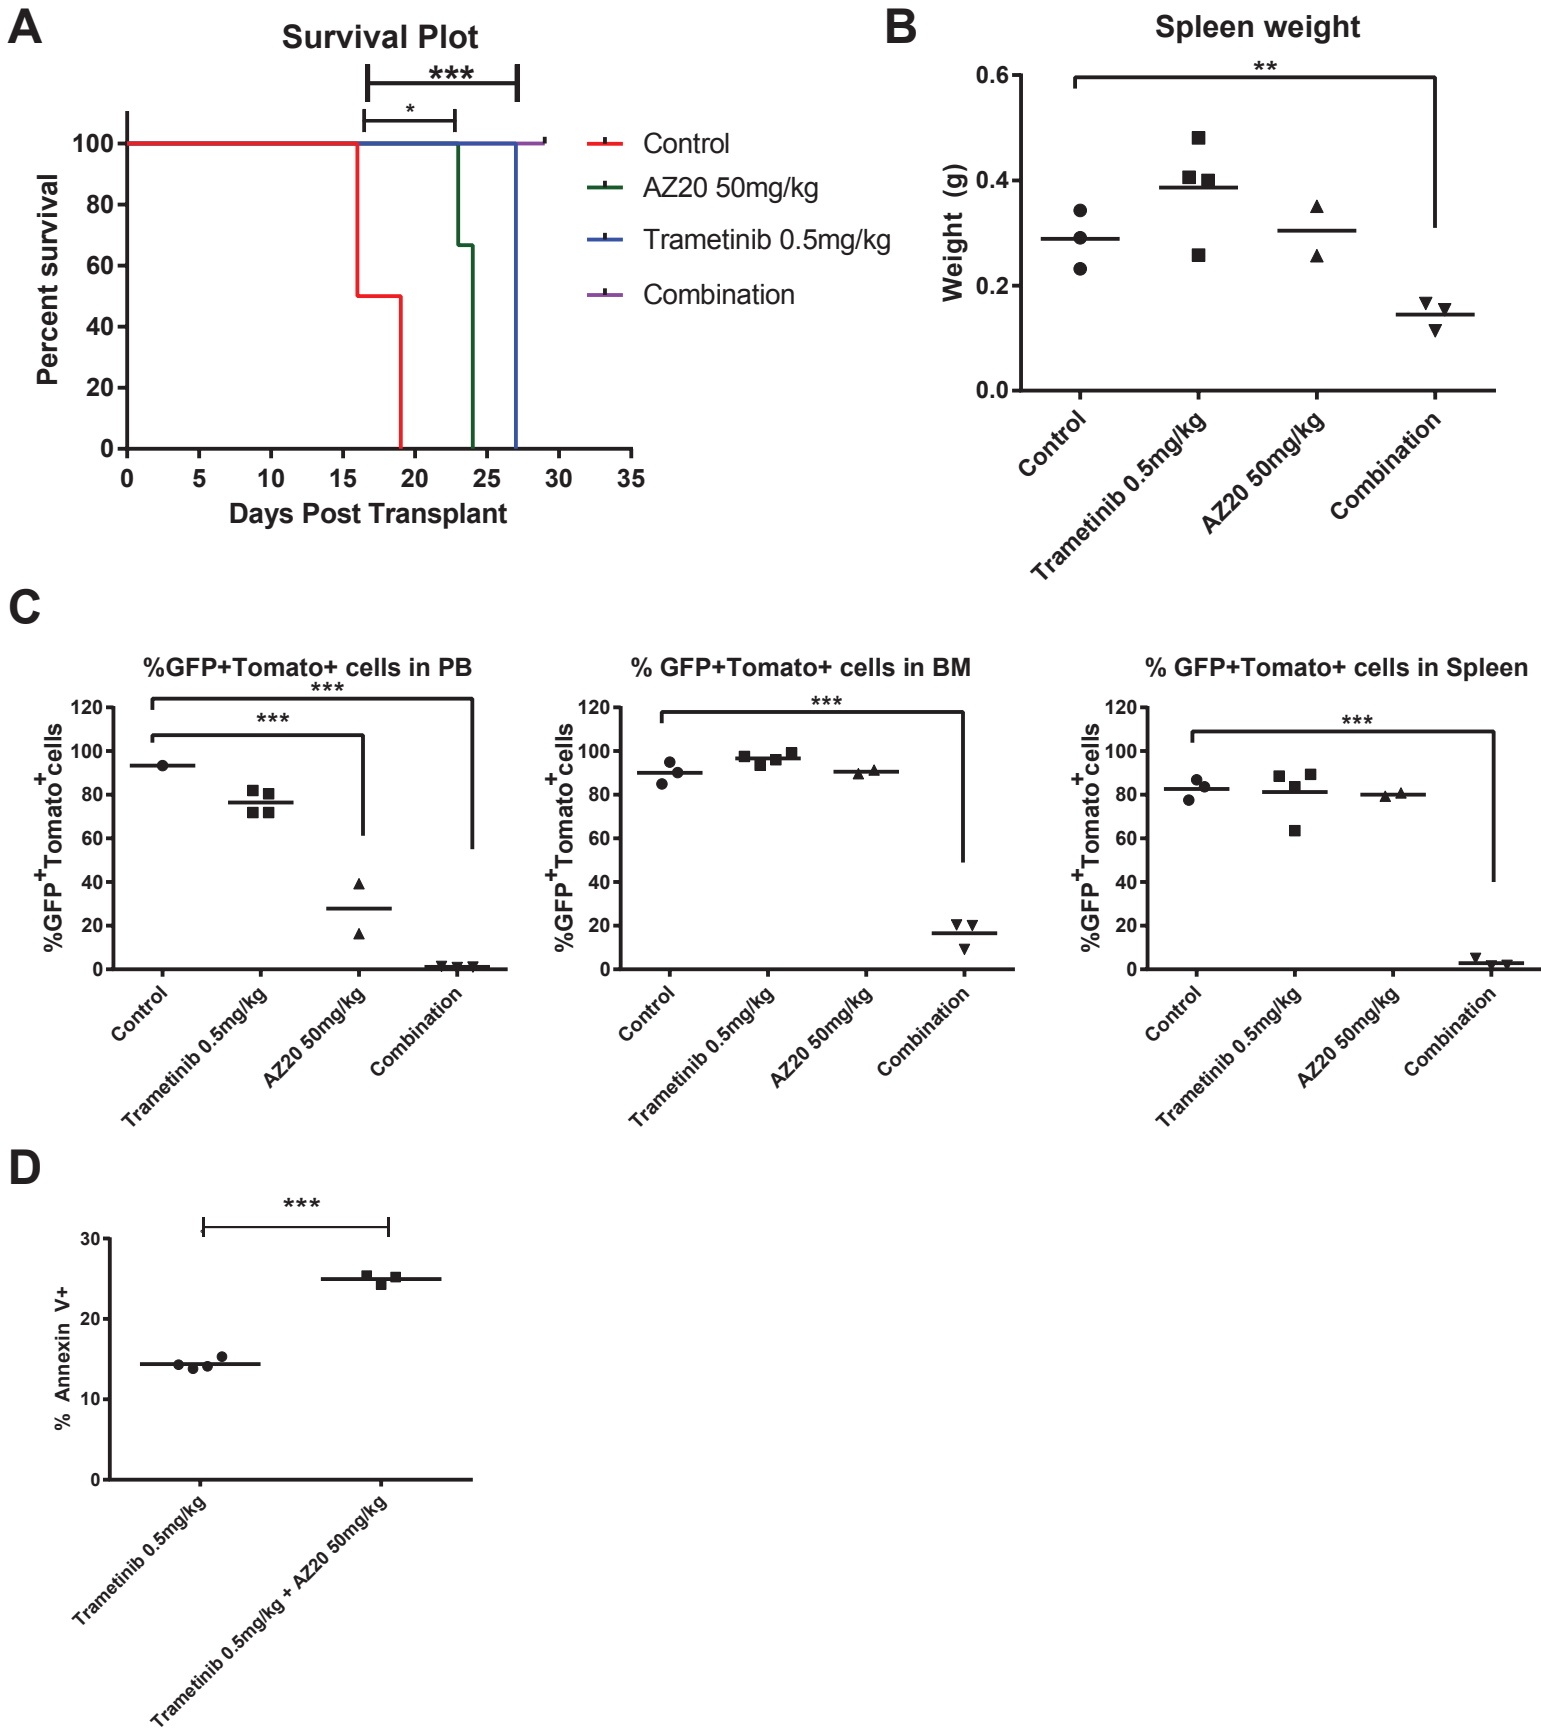

Figure S8

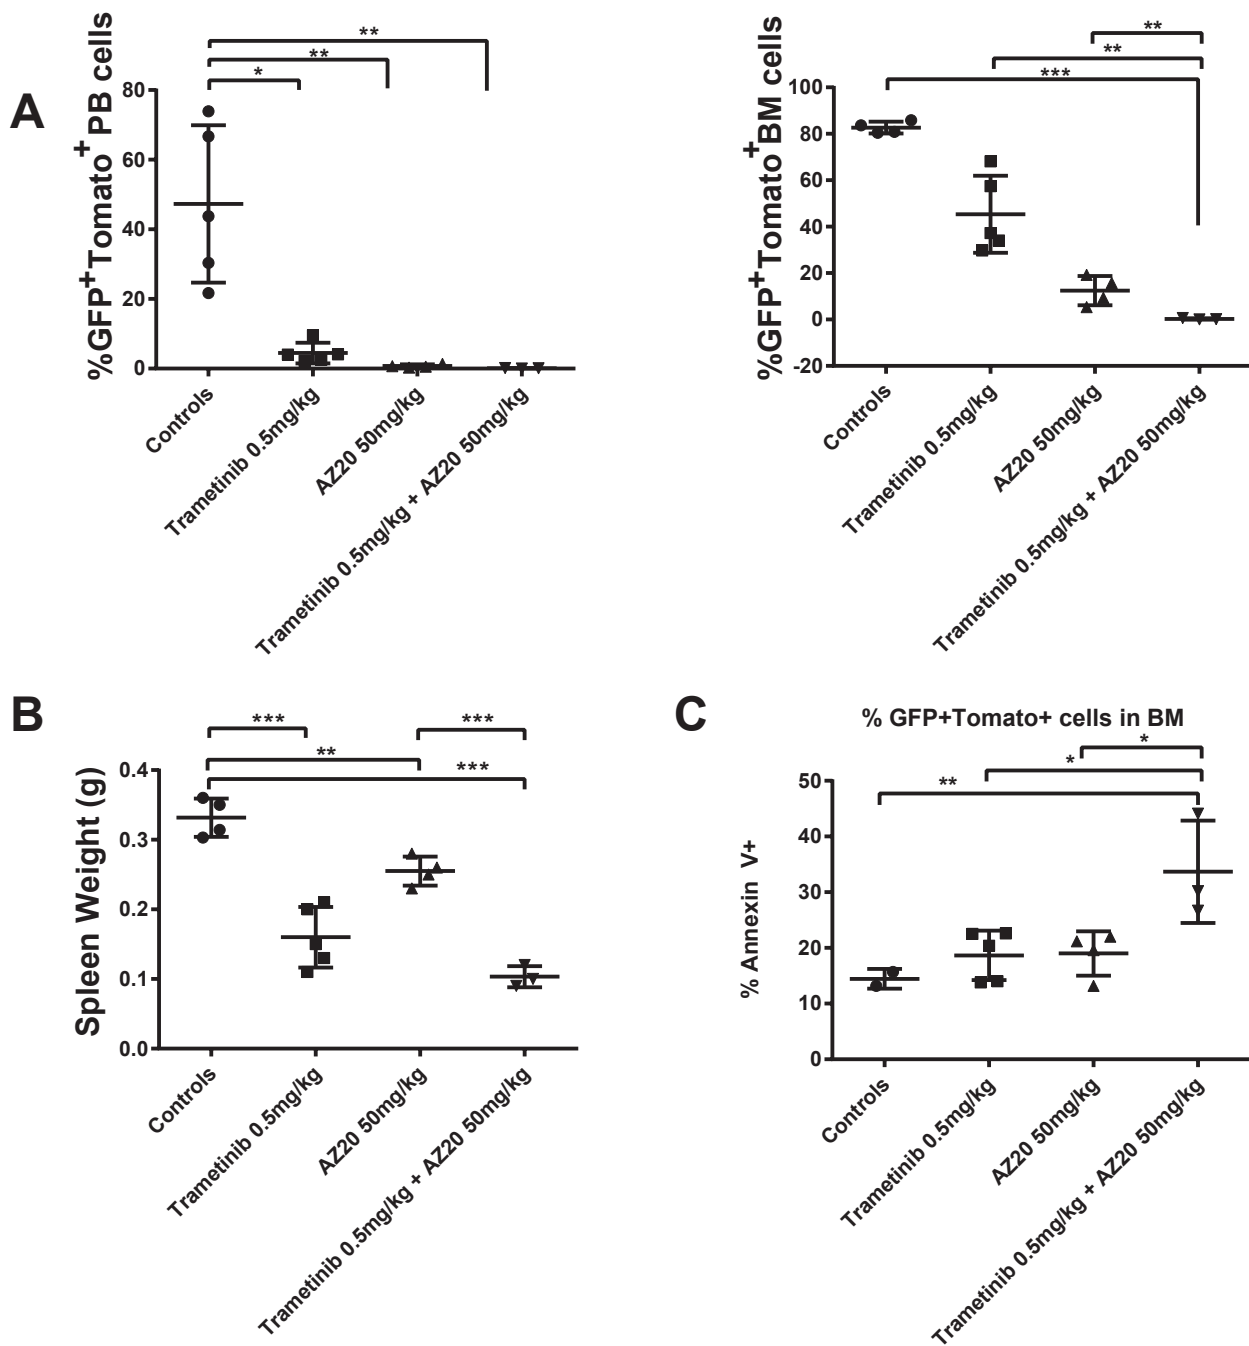

Figure S9

**A**

**Vehicle**

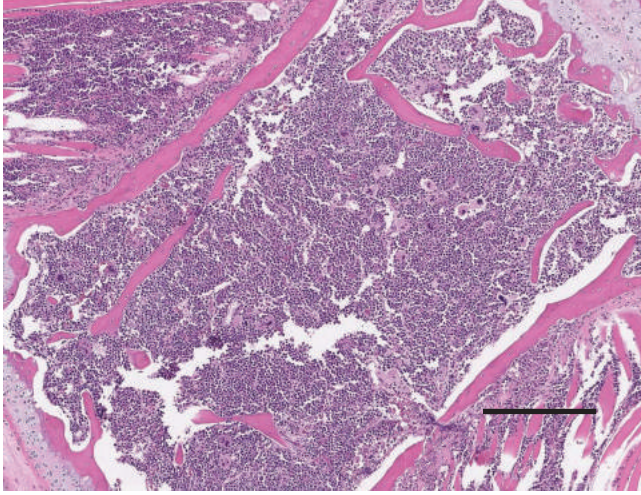

**Combination  
(AZ20+GSK212)**

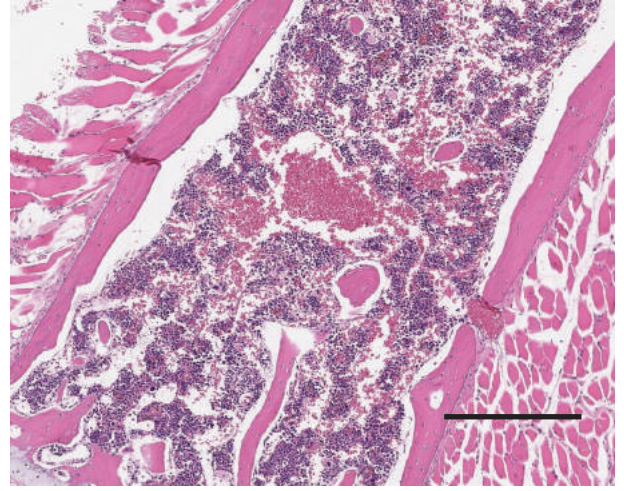

**B**

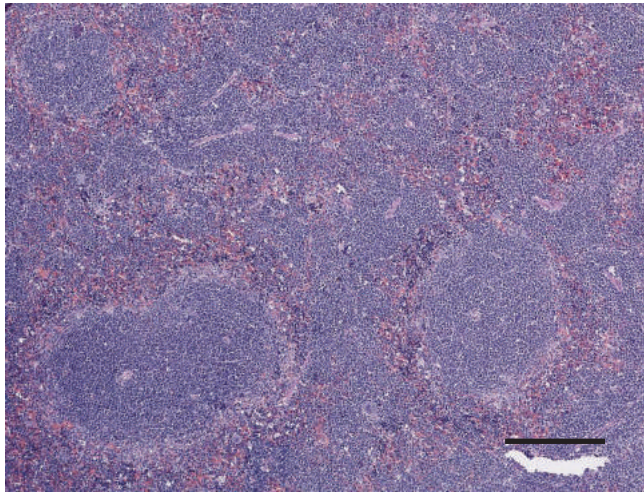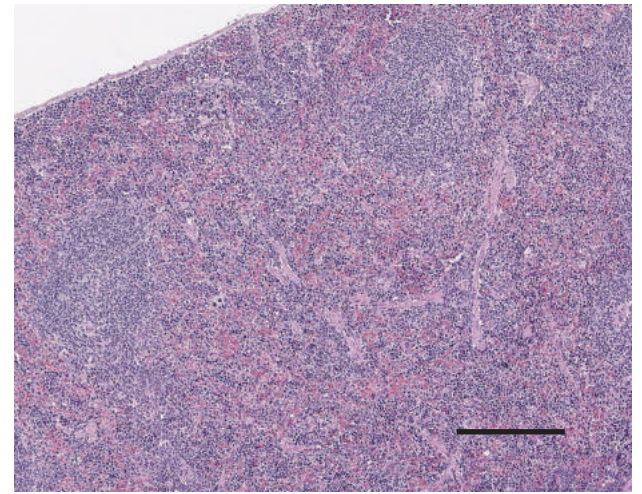

**Figure S10**

# A PDX #83

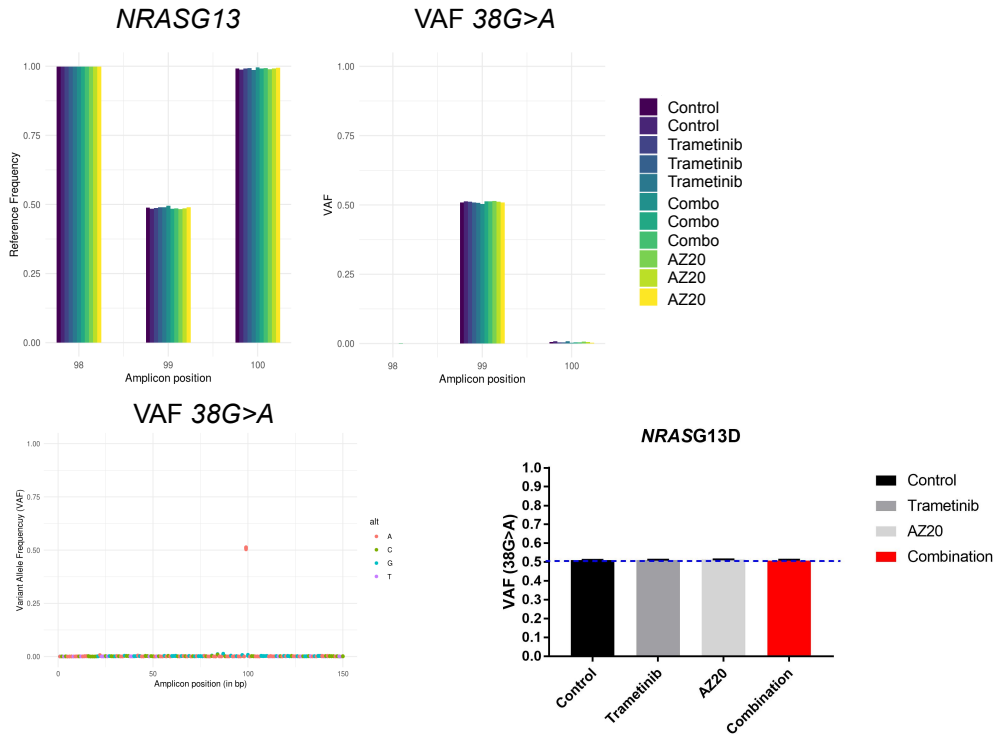

# B PDX #24

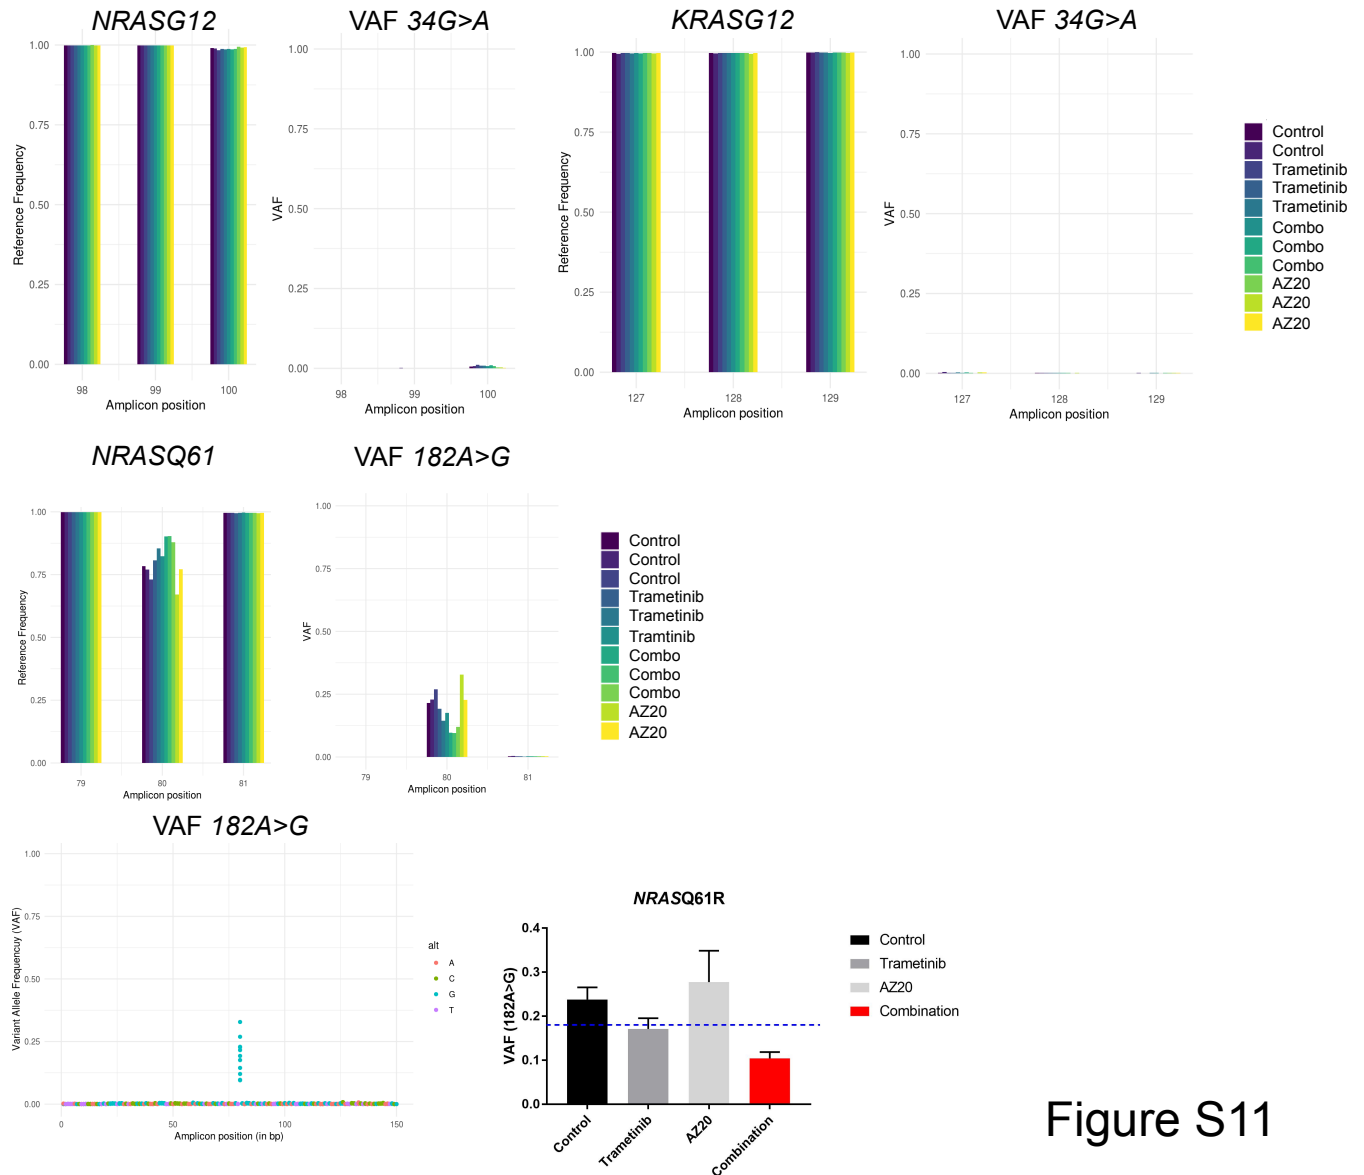

Figure S11

| Sample Name        | Sample ID | Source | Disease | Gene | Protein Var | nuc var | VA F | coverage | location       | type of variant | Gene1, RE | Gene2, RE |
|--------------------|-----------|--------|---------|------|-------------|---------|------|----------|----------------|-----------------|-----------|-----------|
| 042.D1             | #83       | PT     | B-ALL   | NRAS | G13D        | 38G>A   | 33   | 505      | chr1:115258744 | SNV             |           |           |
|                    |           |        |         | MLL1 |             |         |      |          |                | RE              | MLL1      | AF4       |
| 042.D1.m88BM       | #83       | PDX    | B-ALL   | NRAS | G13D        | 38G>A   | 52   | 394      | chr1:115258744 | SNV             |           |           |
|                    |           |        |         | MLL1 |             |         |      |          |                | RE              | MLL1      | AF4       |
| 072.D1             | #24       | PT     | B-ALL   | KRAS | G12S        | 34G>A   | 2    | 723      | chr12:25398285 | SNV             |           |           |
|                    |           |        |         | NRAS | G12S        | 34G>A   | 17   | 650      | chr1:115258748 | SNV             |           |           |
|                    |           |        |         | NRAS | Q61R        | 182A>G  | 1    | 668      | chr1:115256529 | SNV             |           |           |
|                    |           |        |         | MLL1 |             |         |      |          |                | RE              | MLL1      | AF4       |
| 072.D1.CD3-.m189BM | #24       | PDX    | B-ALL   | NRAS | Q61R        | 182A>G  | 18   | 428      | chr1:115256529 | SNV             |           |           |
|                    |           |        |         | NRAS | G12S        | 34G>A   | 2    | 423      | chr1:115258748 | SNV             |           |           |
|                    |           |        |         | MLL1 |             |         |      |          |                | RE              | MLL1      | AF4       |

**Table S1**
